# Supplementary material for: Daptomycin Pharmacokinetics in Blood and Wound Fluid in Critical Ill Patients with Left Ventricle Assist Devices
Source: Antibiotics (Basel). 2023 May 13;12(5):904. doi: 10.3390/antibiotics12050904 (PMC10215934; doi:10.3390/antibiotics12050904)
Supplement: Supplementary file 1 [file antibiotics-12-00904-s001.zip › antibiotics-2352730-supplemental table-5.5.xlsx]

## Sheet: Conc. Drainage+Blood
		Day 1							Day 2							Day 3
		daily timepoint							daily timepoint
	Samples	08:00:00	10:00:00	13:00:00	16:00:00	19:00:00	07:00:00		08:00:00	10:00:00	13:00:00	16:00:00	19:00:00	07:00:00		08:00:00	10:00:00	13:00:00	16:00:00	19:00:00	07:00:00
Patient 1	Drainage 1	1.9	6	8.1	9.9	9.4	7.2		8.1	15	20.1	21.7	26	22.7		31.6	42.5	41.3	37.9	39.6	34.3
	Blood	42.2				18	14.4		82.4				38.2	33.1		97.2				62.5	58.6
Patient 2	Drainage 1	12	18.3	21.3	18.4	16.3	12.9		11.3	16.4	16.4	16.9	12.5	10.3		13.1	17.2	18.7	14.8	13.9	14.3
	Drainage 2										15.2	15.9	12.7	10.8		16.1	17.3	20	16.5	18.9	16
	Blood	59.9				30.6	22.5		56.9				34.8	23.8		78				43.6	36.5
Patient 3	Drainage 1	15.1	16	18.3	27.1	21.1	16			22.3	23.1	21.5	20.6			35.4	33.2	41.4	34.1	25.8
	Drainage 2	9.3	13	24.3	22		12.4		18	29	32.8	29.6	29.5	29.6		29.7	36.2	39.5	34.3	31.5	26.9
	Blood	133.8				46.6	29.5		125.5				68.4	32.6		92.8				64.4	43.4
Patient 4	Drainage 1	17.5	15.8	21.8		22.5	18.2		22.3	35	38.2	31.1	32.8	30.7		30.4	32.5
	Blood	68.1				30.8	26.6		84.5				41.7	30.1		69
Patient 5	Drainage 1	15.2	20.7		27.5	27.3	20.3		20.3	22.4	29.4	31.1	32.4	29.1		26.7	33	31.8	34.6	39.9	33
	Blood	62.9				33.1	27.4		75.7				49.8	36.6		88.1				46.9	42.8
Patient 6	Drainage 1		17.9				12.4		11.4	14.4	23.2	25.4	33.6	13.8		20.4	25.1	27.4	42.6	43.4	30
	Drainage 2		13.1	14.8	16.4	17.4	8.2		10.1	11.9	15.6	33.2		15		15.5	20.4	27.4	25.9	26.3	17.8
	Blood	80.6				40.3			125.8				50.5	38.6		117.2				56.2	41.1
Patient 7	Drainage 1	0	5.6	7.1	9.6	7.9	7.8		5.5	7.2	11.8		10.5	11.8		7.9	8.3	11.7	12.3	17.7
	Drainage 2	0	1	8	8.7	2	8.8		6.4	9.2	4.4		10.9	13		9.6	8.5	9.8	9.1	10.4
	Blood	71.4				23.6	16.4		59.6				22.5	18.4		77.5				27.1	30.5
Patient 8	Drainage 1	26.1	25.9	28.2	20.3	20.3	21.9		20.3	17.8	24.1	16.6	19.2	14.9		10.1	13.7	24	15.4	16.2	19.1
	Drainage 2	26.6	26.5	22.1	26.9	22.4	18.9		26.1	22.7	30.3	27.3	23.8	16		18.2	13.6	17.7	14.9	12.3	11.3
	Blood	69.9				40.1	30.4		80.4				42.9	31.7		34.3				22.3	18.6
Patient 9	Drainage 1	6	19.6	26.8	29.7	26.4	18.8		15	20.1	21.7	25.4	22.1	18.8		17.7	21.8	23.9	27.3	26.6	20.2
	Drainage 2	0	14.8	31.6	26.7	28.1	16.8		15.5	19.6	22.3	27.6	25			16.3	19.5	24.2	24.4	26.4	13.9
	Blood	116.1				37.6	24.9		77.8				37.5	22.9		90.8				33.4	17.6

## Sheet: additional Infos
	Pretreatment Y=2	Dosis mg/kg	Dosisanpassung	08:00:00	19:00:00	07:00:00	08:00:00	19:00:00	07:00:00	08:00:00	19:00:00	07:00:00	Dialyse	Kat. d1	Kat. d2	Kat. d3	APACHE	SOFA	SAPS	Infektion	Pathogens
1	N	7	N	42.2	18	14.4	82.4	38.2	33.1	97.2	62.5	58.6	J	DCAV	AV	A	29	15	65	N
2	J	7	N	59.9	30.6	22.5	56.9	34.8	23.8	78	43.6	36.5	N	CA	C	C	19	11	59	N
3	J	8	N	133.8	46.6	29.5	125.5	68.4	32.6	92.8	64.4	43.4	N	LDC	DC	C	18	11	28	N
4	J	6	N	68.1	30.8	26.6	84.5	41.7	30.1	69			N	CA	C		25	12	46	N
5	N	7	J d2 5mg/kg	62.9	33.1	27.4	75.7	49.8	36.6	88.1	46.9	42.8	N	CA	CA	CA	24	12	32	Y	HSV TS
6	N	5	J d2 4mg/kg	80.6	40.3		125.8	50.5	38.6	117.2	56.2	41.1	J	SCAV	SCAV	CAV	25	13	52	Y	Kleb.oxy. BK TS
7	N	5	N	71.4	23.6	16.4	59.6	22.5	18.4	77.5	27.1	30.5	N	SCA	CA	CA	25	11	42	N
8	J	5	N	69.9	40.1	30.4	80.4	42.9	31.7	34.3	22.3	18.6	N	SCAV	CA	C	19	9	29	N
9	N	6	N	116.1	37.6	24.9	77.8	37.5	22.9	90.8	33.4	17.6	J	DCAV	DAV	DA	18	7	48	N
